# Supplementary material for: Synergistic effect of crystal and electronic structures on the visible-light-driven photocatalytic performances of Bi2O3 polymorphs
Source: Royal Society of Chemistry journal article supplement (doi:10.1039/c0cp01189d), 2010-01-01
Supplement: c0cp01189d.pdf [file c0cp01189d.pdf]

## Electronic Supplementary Information

### Synergistic effect of crystal and electronic structures on the visible-light-driven photocatalytic performances of $\text{Bi}_2\text{O}_3$ polymorphs

Hefeng Cheng<sup>a</sup>, Baibiao Huang<sup>\*a</sup>, Jibao Lu<sup>b</sup>, Zeyan Wang<sup>a</sup>, Bing Xu<sup>a</sup>, Xiaoyan Qin<sup>a</sup>,

Xiaoyang Zhang<sup>a</sup> and Ying Dai<sup>b</sup>

*State Key Lab of Crystal Materials, School of Physics, Shandong University, Jinan*

*250100, People's Republic of China*

E-mail: [bbhuang@sdu.edu.cn](mailto:bbhuang@sdu.edu.cn)

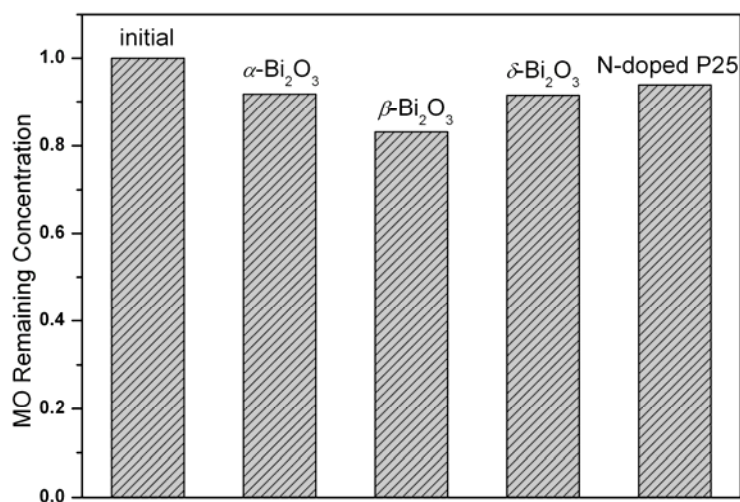

**Figure S1.** The bar plot illustrating the remaining concentration of MO over different photocatalysts after adsorption/desorption equilibrium in the dark.

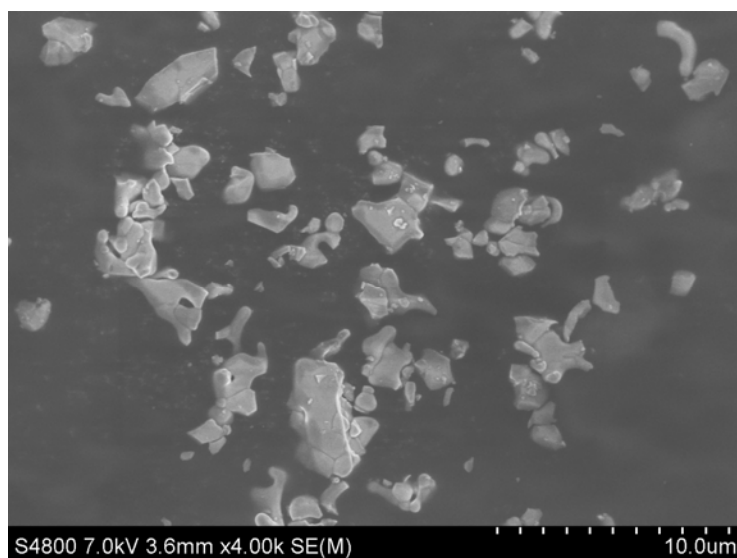

**Figure S2.** The typical SEM image of the as-prepared  $\alpha$ - $\text{Bi}_2\text{O}_3$  (CT) products.

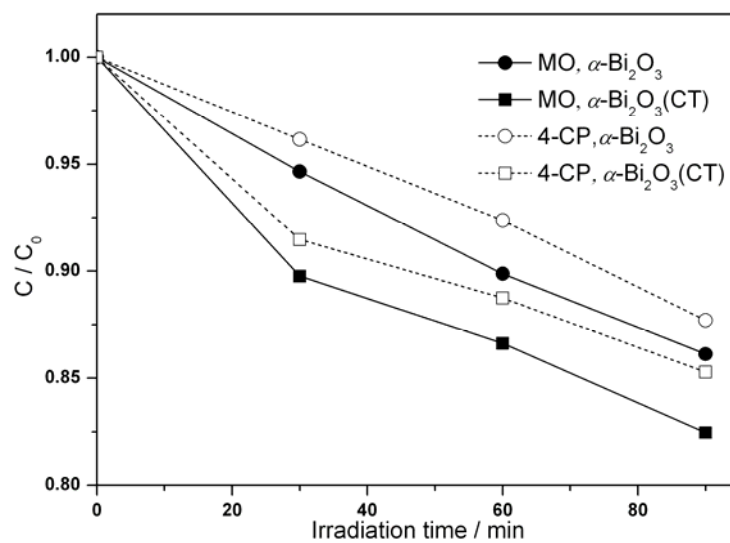

**Figure S3.** Photocatalytic activity comparisons of  $\alpha\text{-Bi}_2\text{O}_3$  and  $\alpha\text{-Bi}_2\text{O}_3$  (CT) products.
